# Supplementary material for: Matching the Diversity of Sulfated Biomolecules: Creation of a Classification Database for Sulfatases Reflecting Their Substrate Specificity
Source: PubMed Central journal article supplement (PMC5066984; doi:10.1371/journal.pone.0164846), 2016-10-17
Supplement: pone.0164846.s001.pdf [file pone.0164846.s001.pdf]

(A)

Catalytic site (PROSITE signature PS00523)

| 49          | 50          | 51          | 52          | 53          | 54          | 55          | 56          | 57          |               | 58          | 59          | 60          | 61          |
|-------------|-------------|-------------|-------------|-------------|-------------|-------------|-------------|-------------|---------------|-------------|-------------|-------------|-------------|
| %           | %           | %           | %           | %           | %           | %           | %           | %           |               | %           | 75          | %           | %           |
| <b>P 43</b> | <b>V 26</b> | <b>C 79</b> | <b>S 29</b> | <b>P 87</b> | <b>S 55</b> | <b>R 99</b> | <b>A 53</b> | <b>S 33</b> | <b>x(0-6)</b> | <b>L 56</b> | <b>L 46</b> | <b>T 83</b> | <b>G 98</b> |
| A 22        | L 23        | S 21        | T 24        | A 9         | T 20        | L 0         | S 15        | A 2         | A9UYU7        | I 17        | M 21        | S 11        | S 0         |
| S 15        | I 11        |             | A 16        | S 0         | A 13        | I 0         | Y 4         | G 8         |               | F 13        | I 11        | A 1         | A 0         |
| G 4         | S 10        |             | G 11        | T 0         | G 6         | Q 0         | G 4         | M 8         |               | M 8         | F 6         | L 1         | C 0         |
| Q 4         | T 8         |             | C 7         | V 0         | F 1         | K 0         | T 3         | T 7         |               | V 2         | Y 3         | M 0         |             |
| T 3         | M 5         |             | M 2         | I 0         | H 0         |             | F 3         | C 4         |               | T 0         | W 2         | R 0         |             |
| N 2         | P 4         |             | V 2         | Q 0         | C 0         |             | C 3         | V 2         |               | Y 0         | H 2         | G 0         |             |
| M 1         | A 3         |             | H 0         | G 0         | N 0         |             | V 3         | E 2         |               | A 0         | V 2         | C 0         |             |
| V 1         | R 2         |             | I 0         | C 0         | Y 0         |             | R 2         | Q 2         |               | C 0         | Q 1         | Y 0         |             |
| L 0         | Q 0         |             | N 0         | M 0         | I 0         |             | M 1         | N 1         |               | W 0         | A 0         | F 0         |             |
| C 0         | N 0         |             | Q 0         | N 0         | V 0         |             | N 1         | D 0         |               | S 0         | T 0         | N 0         |             |
| R 0         | K 0         |             | L 0         | E 0         | M 0         |             | Q 1         | K 0         |               | Q 0         | N 0         | I 0         |             |
| H 0         | Y 0         |             | W 0         |             | Q 0         |             | I 0         | I 0         |               | H 0         | K 0         | H 0         |             |
| Y 0         | F 0         |             | R 0         |             | W 0         |             | P 0         | L 0         |               | K 0         | S 0         | V 0         |             |
| E 0         | G 0         |             | E 0         |             |             |             | H 0         |             |               |             | C 0         | E 0         |             |
| I 0         | E 0         |             | K 0         |             |             |             | L 0         |             |               |             | R 0         | Q 0         |             |
|             | W 0         |             | Y 0         |             |             |             | K 0         |             |               |             |             |             |             |
|             | D 0         |             | F 0         |             |             |             | E 0         |             |               |             |             |             |             |
|             | H 0         |             |             |             |             |             | W 0         |             |               |             |             |             |             |

(B)

PROSITE signature PS00149

| 105         | 106           | 107         | 108         | 109         | 110            | 111         | 112           | 113         | 114            | 115         |               |             |               |             |               |             |               |             |
|-------------|---------------|-------------|-------------|-------------|----------------|-------------|---------------|-------------|----------------|-------------|---------------|-------------|---------------|-------------|---------------|-------------|---------------|-------------|
| %           | %             | %           | %           | %           | %              | %           | %             | %           | %              | %           |               |             |               |             |               |             |               |             |
| <b>G 94</b> | <b>x(0,1)</b> | <b>Y 93</b> | <b>x 12</b> | <b>T 84</b> | <b>x(0,42)</b> | <b>A 31</b> | <b>x(0,3)</b> | <b>L 18</b> | <b>x(0,13)</b> | <b>I 24</b> | <b>x(0,3)</b> | <b>G 95</b> | <b>x(0,5)</b> | <b>K 94</b> | <b>x(0,3)</b> | <b>W 59</b> | <b>x(0,2)</b> | <b>H 81</b> |
| D 2         | Q8I1A5        | I 2         | A 12        | S 3         | A7SK50         | G 23        | A6C8W8        | M 15        | A6C8W8         | F 20        | (50 seq.)     | S 2         | (60 seq.)     | D 2         | (334 seq.)    | M 6         | (91 seq.)     | L 4         |
| N 1         | B4NG05        | V 1         | R 12        | C 3         | Q4SR77         | Y 8         | A6DPF2        | A 11        | A6DPF2         | V 20        |               | T 0         |               | R 1         |               | Y 6         |               | G 3         |
| A 0         | Q298E8        | W 1         | Y 11        | V 2         |                | H 5         | D2R663        | Y 10        | D2R663         | S 8         |               | A 0         |               | Y 0         |               | N 6         |               | N 3         |
| S 0         | B4G3P1        | F 0         | H 9         | N 1         |                | F 4         | A6DPE8        | I 7         | Q7UT91         | A 8         |               | N 0         |               | M 0         |               | L 4         |               | D 1         |
| H 0         | B4JGE7        | M 0         | Q 9         | A 1         |                | L 3         |               | Q 6         | A6CEG6         | T 4         |               | Y 0         |               | L 0         |               | F 3         |               | Q 1         |
| Q 0         | B4K587        | H 0         | N 8         | M 0         |                | I 3         |               | H 5         | A6DTI5         | L 2         |               | Q 0         |               | I 0         |               | T 2         |               | A 1         |
| K 0         | Q8I189        | L 0         | S 6         | P 0         |                | C 3         |               | F 4         | A6DQD9         | C 2         |               | F 0         |               | E 0         |               | H 2         |               | F 0         |
| E 0         | B3MSR6        | R 0         | T 5         | L 0         |                | S 5         |               | C 4         | A6DR17         | M 1         |               | P 0         |               | H 0         |               | A 2         |               | M 0         |
| R 0         | B4I238        | A 0         | V 5         | I 0         |                | V 5         |               | S 3         | G0L5L5         | Y 1         |               | D 0         |               | T 0         |               | C 1         |               | W 0         |
| L 0         | Q9VE24        | T 0         | D 4         | H 0         |                | M 5         |               | V 2         |                | K 1         |               | C 0         |               | N 0         |               | S 1         |               | S 0         |
|             | Q8I1I2        | C 0         | K 4         | R 0         |                | Q 5         |               | N 2         |                | N 1         |               | R 0         |               | V 0         |               | K 1         |               | Y 0         |
|             | B3P396        | E 0         | E 3         | K 0         |                | T 5         |               | G 1         |                | D 0         |               | I 0         |               | F 0         |               | Q 0         |               | K 0         |
|             | B4PM30        | D 0         | F 2         | F 0         |                | E 0         |               | W 1         |                | G 0         |               |             |               |             |               | V 0         |               | C 0         |
|             | B4QTX6        | N 0         | L 1         |             |                | W 0         |               | T 1         |                | W 0         |               |             |               |             |               | G 0         |               | P 0         |
|             | B8M2K9        |             | M 1         |             |                | N 0         |               | R 0         |                | Q 0         |               |             |               |             |               | D 0         |               | T 0         |
|             | A3LZV3        |             | I 0         |             |                | K 0         |               | K 0         |                | H 0         |               |             |               |             |               | I 0         |               | I 0         |
|             | A6DJ41        |             | G 0         |             |                | R 0         |               | E 0         |                | R 0         |               |             |               |             |               | R 0         |               | E 0         |
|             | A6DJ58        |             | W 0         |             |                | P 0         |               | D 0         |                | E 0         |               |             |               |             |               | P 0         |               | V 0         |
|             |               |             | C 0         |             |                |             |               |             |                | P 0         |               |             |               |             |               | E 0         |               | R 0         |



(D)

Calcium binding 2 consensus

| 309         | 310         |               | 311         | 312         | 313         | 314         |               | 315         | 316         |               | 317         | 318         | 319         |
|-------------|-------------|---------------|-------------|-------------|-------------|-------------|---------------|-------------|-------------|---------------|-------------|-------------|-------------|
| %           | %           |               | %           | %           | %           | %           |               | %           | %           |               | %           | %           | %           |
| <b>N 72</b> | <b>T 94</b> | <b>x(0-2)</b> | <b>I 40</b> | <b>V 43</b> | <b>I 37</b> | <b>F 57</b> | <b>x(0-1)</b> | <b>T 42</b> | <b>S 65</b> | <b>x(0-1)</b> | <b>D 99</b> | <b>N 61</b> | <b>G 99</b> |
| D 15        | S 2         | D5EMJ7        | L 32        | I 42        | V 31        | Y 22        | 188 seq.      | S 12        | T 12        | E6X913        | E 0         | H 32        | A 0         |
| E 3         | A 2         | D5EN67        | V 9         | L 8         | F 10        | V 7         |               | L 9         | G 11        |               | R 0         | Q 5         | S 0         |
| K 2         | L 0         | D5EN14        | Y 5         | F 3         | L 10        | L 6         |               | M 7         | A 9         |               | T 0         | S 0         | R 0         |
| S 1         | Q 0         | D5EN19        | M 4         | T 0         | M 4         | I 2         |               | I 5         | N 0         |               | Y 0         | M 0         | P 0         |
| R 1         | I 0         | D5EN12        | F 4         | M 0         | Y 1         | W 0         |               | V 5         | D 0         |               | A 0         | D 0         | T 0         |
| H 0         | R 0         | D5EMJ6        | W 1         | A 0         | W 1         | R 0         |               | F 3         | C 0         |               |             | A 0         | Q 0         |
| Q 0         | G 0         | D5ENX2        | A 1         | Q 0         | C 1         | A 0         |               | A 3         | P 0         |               |             | P 0         | N 0         |
| T 0         | V 0         | C0FVD6        | T 0         |             | A 0         | M 0         |               | W 2         | Q 0         |               |             | F 0         |             |
| G 0         | N 0         | F4AN26        | H 0         |             | H 0         | H 0         |               | G 2         | V 0         |               |             | I 0         |             |
| P 0         | C 0         |               | C 0         |             | T 0         | C 0         |               | C 2         | H 0         |               |             |             |             |
| I 0         | P 0         |               | D 0         |             | Q 0         | S 0         |               | Y 1         | I 0         |               |             |             |             |
| Y 0         | Y 0         |               | R 0         |             | S 0         | Q 0         |               | N 0         |             |               |             |             |             |
| W 0         |             |               | S 0         |             | G 0         | G 0         |               | Q 0         |             |               |             |             |             |
|             |             |               |             |             |             |             |               | H 0         |             |               |             |             |             |
|             |             |               |             |             |             |             |               | E 0         |             |               |             |             |             |
|             |             |               |             |             |             |             |               | D 0         |             |               |             |             |             |
|             |             |               |             |             |             |             |               | K 0         |             |               |             |             |             |

(E)

New signature

| 200         | 201         | 202         | 203         |               | 204         |                | 205         | 206         |               | 207         | 208         |               | 209         | 210         | 211         |
|-------------|-------------|-------------|-------------|---------------|-------------|----------------|-------------|-------------|---------------|-------------|-------------|---------------|-------------|-------------|-------------|
| %           | %           | %           | %           |               | %           |                | %           | %           |               | %           | %           |               | %           | %           | %           |
| <b>P 93</b> | <b>F 75</b> | <b>F 66</b> | <b>L 55</b> | <b>x(0,1)</b> | <b>Y 39</b> | <b>x(0,34)</b> | <b>L 29</b> | <b>A 30</b> | <b>x(0,1)</b> | <b>F 26</b> | <b>T 20</b> | <b>x(0,5)</b> | <b>A 39</b> | <b>P 62</b> | <b>H 99</b> |
| N 2         | W 12        | L 9         | M 12        | B9NR18        | W 9         | B2AAG4         | V 27        | S 25        | D5EPW8        | Y 17        | N 12        | A9VAR3        | D 8         | V 13        | K 0         |
| K 1         | L 4         | C 9         | A 10        | B9NR19        | V 8         |                | I 9         | G 11        |               | H 12        | G 7         |               | R 7         | T 7         | Y 0         |
| S 0         | I 2         | M 5         | V 6         | D5EPW8        | M 5         |                | Y 9         | N 10        |               | T 11        | H 5         |               | H 6         | M 5         | G 0         |
| R 0         | V 1         | Y 3         | I 5         | B9R4R2        | T 5         |                | F 8         | P 6         |               | P 9         | K 5         |               | E 5         | I 2         | N 0         |
| D 0         | Y 1         | A 2         | C 2         |               | F 4         |                | M 5         | H 4         |               | L 8         | Y 5         |               | K 4         | A 2         | V 0         |
| A 0         | M 0         | V 0         | G 1         |               | A 4         |                | A 3         | T 3         |               | M 4         | F 5         |               | L 4         | C 1         | R 0         |
| T 0         | C 0         | I 0         | T 1         |               | H 4         |                | W 2         | C 2         |               | S 3         | V 4         |               | G 3         | G 1         | I 0         |
| Q 0         | T 0         | S 0         | S 1         |               | Q 3         |                | C 1         | E 2         |               | A 1         | S 4         |               | N 3         | S 0         | D 0         |
| G 0         | A 0         | T 0         | F 1         |               | S 3         |                | H 1         | W 1         |               | I 1         | P 4         |               | S 3         | L 0         |             |
| H 0         | H 0         | H 0         | Y 0         |               | L 2         |                | T 0         | Q 0         |               | Q 1         | I 4         |               | P 2         | N 0         |             |
| F 0         | S 0         | W 0         | H 0         |               | N 2         |                | S 0         | D 0         |               | G 0         | Q 4         |               | T 2         | H 0         |             |
|             | Q 0         |             | Q 0         |               | I 1         |                | Q 0         | V 0         |               | W 0         | A 3         |               | Q 1         | Q 0         |             |
|             | G 0         |             | W 0         |               | K 1         |                | N 0         | L 0         |               | V 0         | L 3         |               | V 1         | E 0         |             |
|             | K 0         |             | N 0         |               | G 1         |                | E 0         | M 0         |               | C 0         | D 2         |               | I 1         | F 0         |             |
|             |             |             | E 0         |               | C 0         |                |             | F 0         |               | N 0         | W 2         |               | M 1         | C 0         |             |
|             |             |             |             |               | E 0         |                |             | Y 0         |               | E 0         | R 1         |               | F 0         | Y 0         |             |
|             |             |             |             |               | R 0         |                |             |             |               | D 0         | M 0         |               | C 0         | W 0         |             |
|             |             |             |             |               | D 0         |                |             |             |               |             | E 0         |               | W 0         |             |             |
|             |             |             |             |               |             |                |             |             |               |             | C 0         |               |             |             |             |
