# Supplementary material for: Matching the Diversity of Sulfated Biomolecules: Creation of a Classification Database for Sulfatases Reflecting Their Substrate Specificity
Source: PubMed Central journal article supplement (PMC5066984; doi:10.1371/journal.pone.0164846), 2016-10-17
Supplement: pone.0164846.s002.pdf [file pone.0164846.s002.pdf]

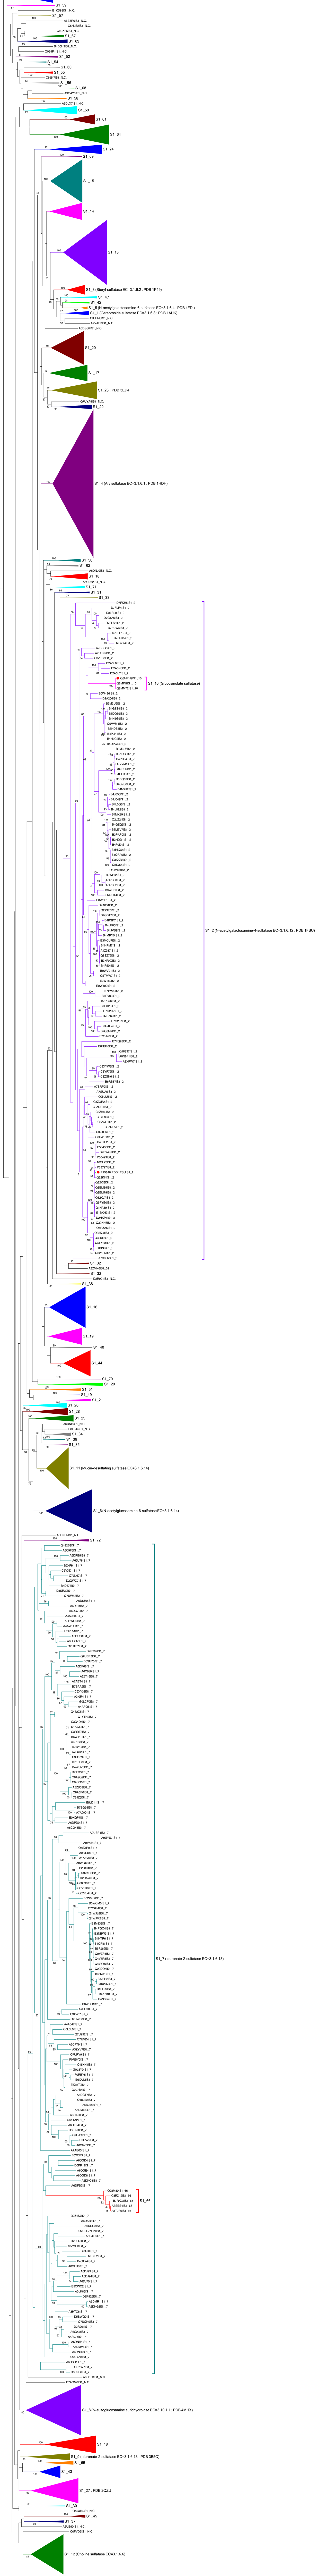

S1\_2 (N-acetyl)galactosamine-4-sulfatase EC=3.1.6.12; PDB 1FSU

S1\_7 (Iduronate-2-sulfatase EC=3.1.6.13)
