# Supplementary material for: Matching the Diversity of Sulfated Biomolecules: Creation of a Classification Database for Sulfatases Reflecting Their Substrate Specificity
Source: PubMed Central journal article supplement (PMC5066984; doi:10.1371/journal.pone.0164846), 2016-10-17
Supplement: pone.0164846.s003.pdf [file pone.0164846.s003.pdf]

## Alkylsulfodioxygenase consensus

| 156         | 157         | 158          | 159         | 160         | 161         | 162          | 163         | 164         |               | 165         | 166         |               | 167         | 168         |
|-------------|-------------|--------------|-------------|-------------|-------------|--------------|-------------|-------------|---------------|-------------|-------------|---------------|-------------|-------------|
|             | %           | %            | %           | %           | %           | %            | %           | %           |               | %           | %           |               | %           | %           |
| <b>D 68</b> | <b>N 29</b> | <b>L 100</b> | <b>W 87</b> | <b>A 98</b> | <b>V 54</b> | <b>H 100</b> | <b>T 58</b> | <b>N 99</b> | <b>x(0,1)</b> | <b>A 27</b> | <b>Y 81</b> | <b>x(0,2)</b> | <b>D 98</b> | <b>Y 96</b> |
| E 27        | T 21        |              | R 10        | V 1         | L 23        |              | S 30        | F 0         | A9H456        | D 24        | F 17        | Q10ZT1        | E 0         | L 1         |
| N 3         | K 18        |              | V 1         |             | I 13        |              | G 8         |             | C2AL50        | E 16        | G 0         | C2AL50        | S 0         | Q 0         |
|             | R 10        |              |             |             | R 3         |              | D 1         |             | D5UT36        | R 11        | A 0         | D5UT36        |             | H 0         |
|             | Q 6         |              |             |             | T 2         |              | N 0         |             |               | Q 6         |             |               |             |             |
|             | G 4         |              |             |             | E 1         |              |             |             |               | L 4         |             |               |             |             |
|             | S 3         |              |             |             | M 0         |              |             |             |               | V 4         |             |               |             |             |
|             | E 1         |              |             |             |             |              |             |             |               | T 1         |             |               |             |             |
|             | D 1         |              |             |             |             |              |             |             |               | P 0         |             |               |             |             |
|             | A 1         |              |             |             |             |              |             |             |               | K 0         |             |               |             |             |
|             |             |              |             |             |             |              |             |             |               | H 0         |             |               |             |             |
