# Supplementary material for: Matching the Diversity of Sulfated Biomolecules: Creation of a Classification Database for Sulfatases Reflecting Their Substrate Specificity
Source: PubMed Central journal article supplement (PMC5066984; doi:10.1371/journal.pone.0164846), 2016-10-17
Supplement: pone.0164846.s005.pdf [file pone.0164846.s005.pdf]

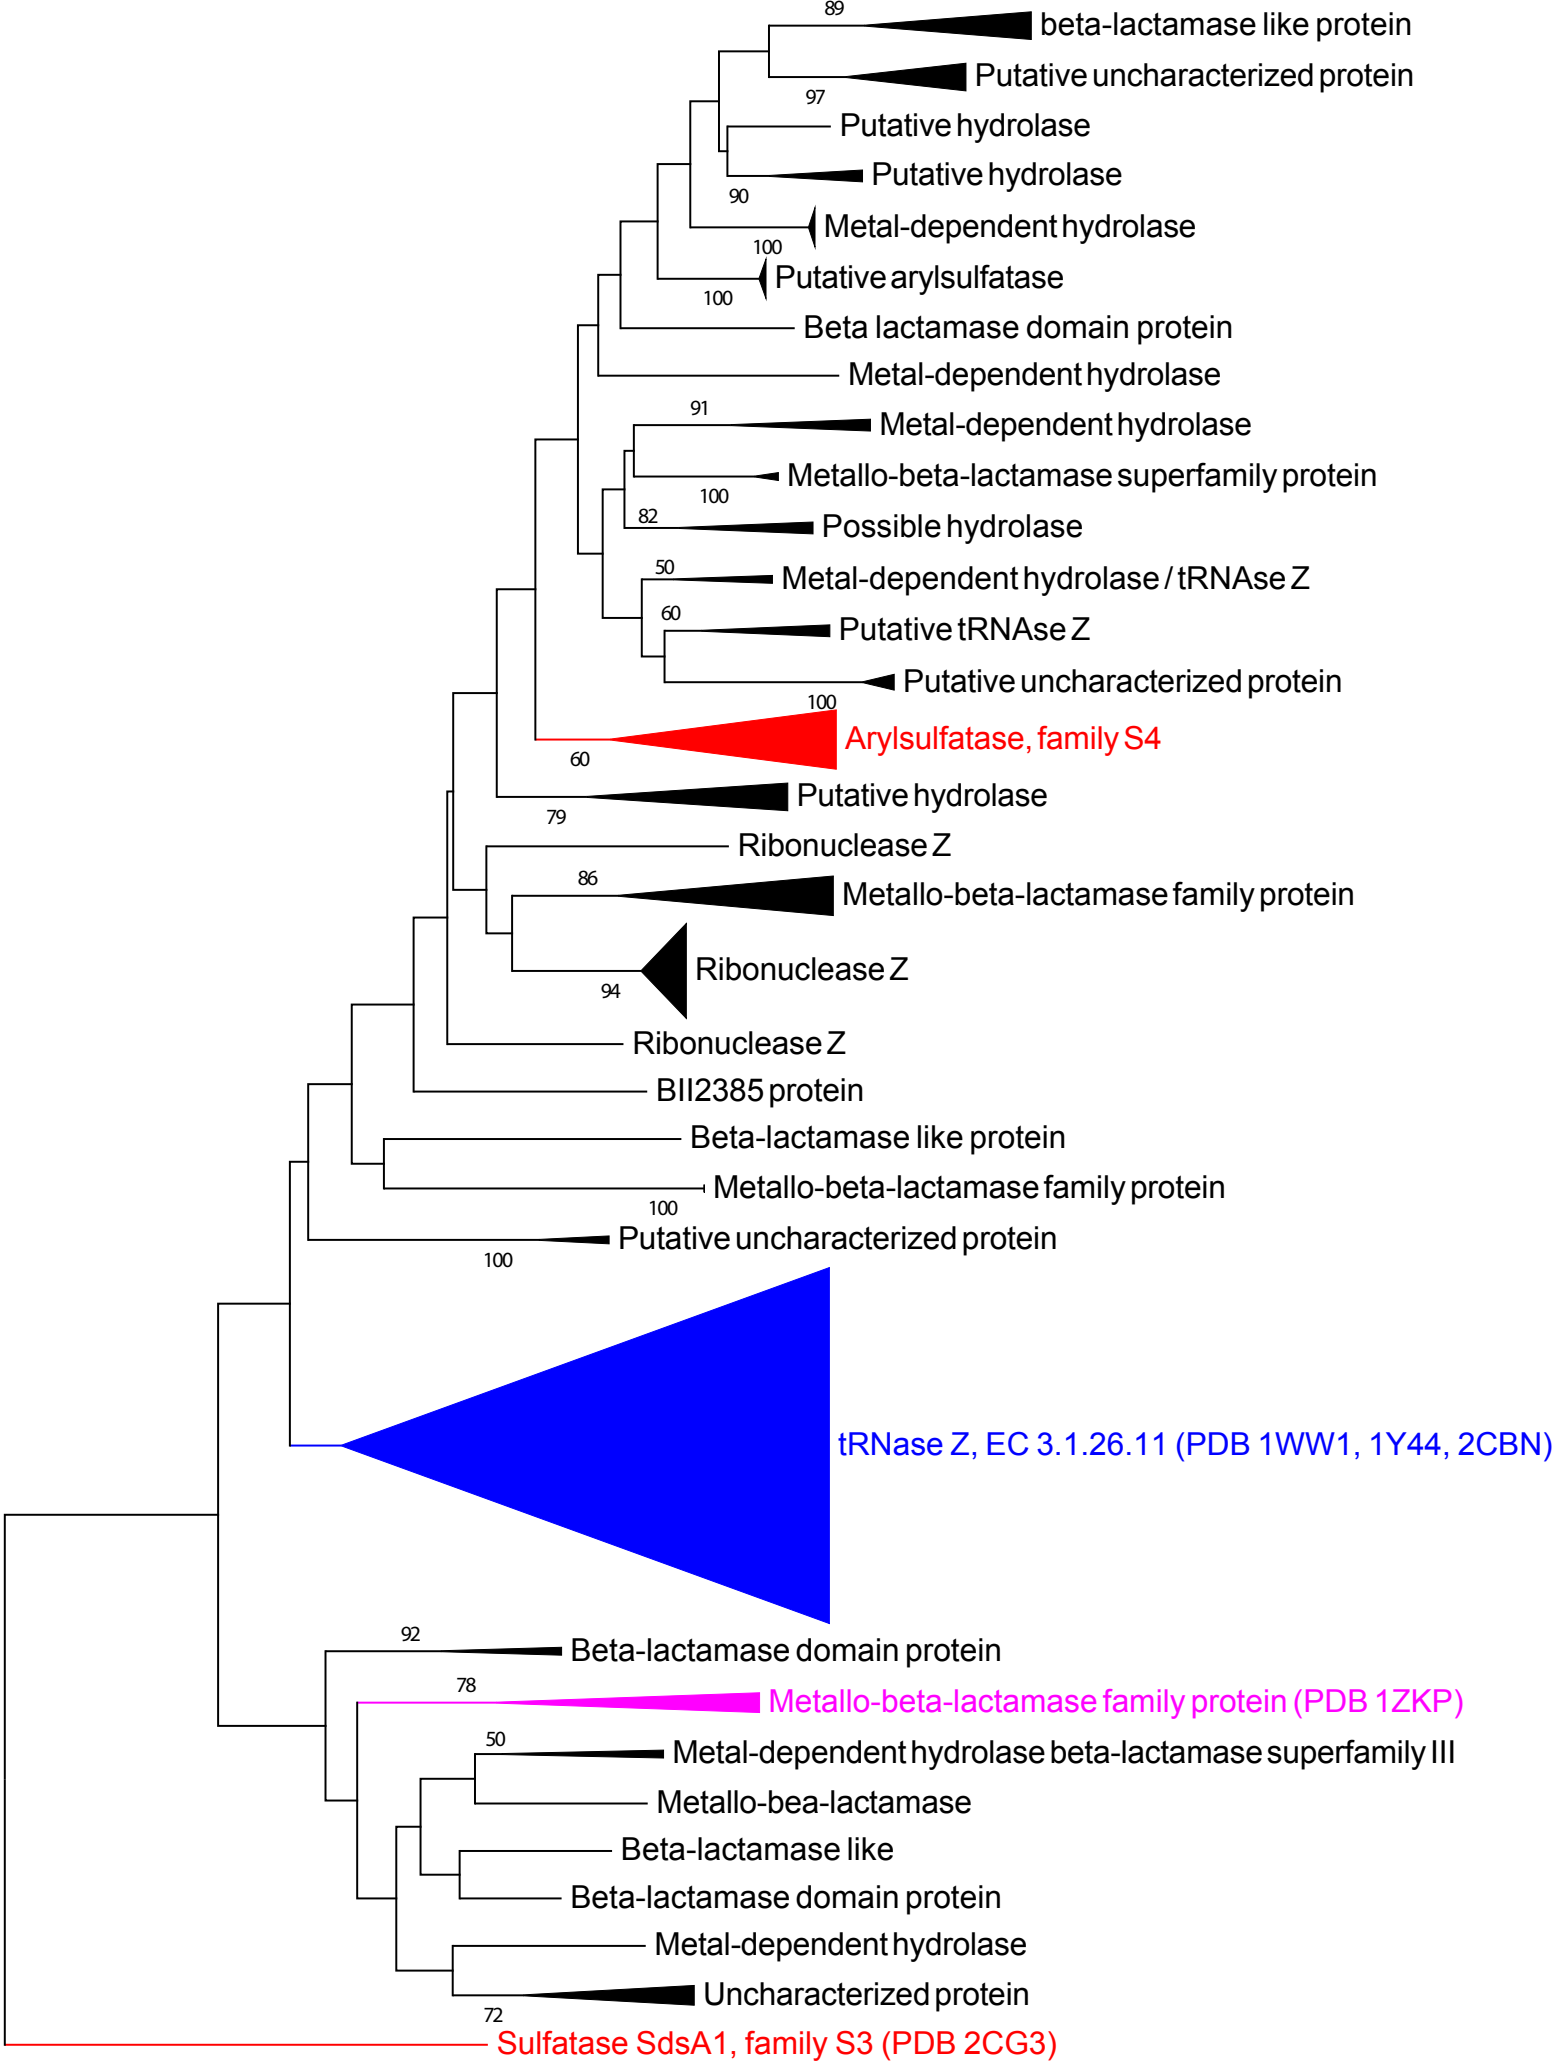

0.2
